# Supplementary material for: Combinatorial Treatment of DNA and Chromatin-Modifying Drugs Cause Cell Death in Human and Canine Osteosarcoma Cell Lines
Source: PLOS journal article supplement (doi:10.1371/journal.pone.0043720), 2012-09-05

**Supplementary  
Figure S1**

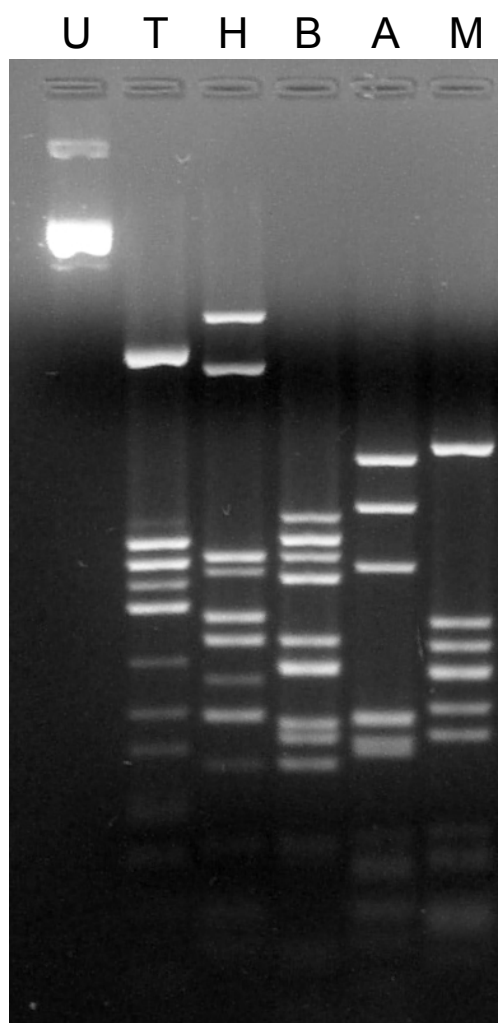

Supplement: S1 (10.1371/journal.pone.0043720.s001) [file journal.pone.0043720.s001]
